# Novel GLP-1 Fusion Chimera as Potent Long Acting GLP-1 Receptor Agonist

Qinghua Wang<sup>1,2,3\*</sup>, Kui Chen<sup>1</sup>, Rui Liu<sup>1</sup>, Fang Zhao<sup>1</sup>, Sandeep Gupta<sup>1</sup>, Nina Zhang<sup>1</sup>, Gerald J. Prud'homme<sup>4</sup>

**1** Division of Endocrinology and Metabolism, the Keenan Research Centre in the Li Ka Shing Knowledge Institute, St. Michael's Hospital, Toronto, Ontario, Canada, **2** Department of Physiology, University of Toronto, Toronto, Ontario, Canada, **3** Department of Medicine, University of Toronto, Toronto, Ontario, Canada, **4** Department of Laboratory Medicine, St Michael's Hospital, Toronto, Ontario, Canada

## Abstract

GLP-1 has a variety of anti-diabetic effects. However, native GLP-1 is not suitable for therapy of diabetes due to its short half-life ( $t_{1/2} < 2$  min). To circumvent this, we developed a long-lasting GLP-1 receptor agonist by the fusion of GLP-1 with human IgG2 Fc (GLP-1/hIgG2). ELISA-based receptor binding assay demonstrated that GLP-1/hIgG2 had high binding affinity to the GLP-1R in INS-1 cells ( $K_d = 13.90 \pm 1.52$  nM). Upon binding, GLP-1/hIgG2 was rapidly internalized by INS-1 cells in a dynamin-dependent manner. Insulin RIA showed that GLP-1/hIgG2 dose-dependently stimulated insulin secretion from INS-1 cells. Pharmacokinetic studies in CD1 mice showed that with intraperitoneal injection (i.p.), the GLP-1/hIgG2 peaked at 30 minutes in circulation and maintained a plateau for  $>168$  h. Intraperitoneal glucose tolerance test (IPGTT) in mice showed that GLP-1/hIgG2 significantly decreased glucose excursion. Furthermore, IPGTT performed on mice one week after a single drug-injection also displayed significantly reduced glucose excursion, indicating that GLP-1/hIgG2 fusion protein has long-lasting effects on the modulation of glucose homeostasis. GLP-1/hIgG2 was found to be effective in reducing the incidence of diabetes in multiple-low-dose streptozotocin-induced type 1 diabetes in mice. Together, the long-lasting bioactive GLP-1/hIgG2 retains native GLP-1 activities and thus may serve as a potent GLP-1 receptor agonist.

**Citation:** Wang Q, Chen K, Liu R, Zhao F, Gupta S, et al. (2010) Novel GLP-1 Fusion Chimera as Potent Long Acting GLP-1 Receptor Agonist. PLoS ONE 5(9): e12734. doi:10.1371/journal.pone.0012734

**Editor:** Kathrin Maedler, University of Bremen, Germany

**Received:** May 16, 2010; **Accepted:** August 13, 2010; **Published:** September 15, 2010

**Copyright:** © 2010 Wang et al. This is an open-access article distributed under the terms of the Creative Commons Attribution License, which permits unrestricted use, distribution, and reproduction in any medium, provided the original author and source are credited.

**Funding:** This work was supported by grants from the Juvenile Diabetes Research Foundation (PI: Q Wang; Co-PI: G Prud'homme) and St Michael's Hospital. Research in the Wang lab was supported by Canadian Institute for Health Research (CIHR) and Canadian Diabetes association. Q Wang is supported by CIHR New Investigator Program. The funders had no role in study design, data collection and analysis, decision to publish, or preparation of the manuscript.

**Competing Interests:** The authors have declared that no competing interests exist.

\* E-mail: qinghua.wang@utoronto.ca

## Introduction

Glucagon like peptide 1 (GLP-1) is a 30-amino acid peptide that is secreted from intestinal L-cells in response to nutrient ingestion and promotes nutrient absorption via regulation of islet hormone secretion [1;2]. Through activation of the GLP-1 receptor (GLP-1R), a G-protein-coupled receptor (GPCR), GLP-1 stimulates insulin secretion and suppresses glucagon secretion thereby lowering blood glucose in rodents as well as in humans [3;4]. In addition, GLP-1 increases insulin gene expression and upregulates insulin biosynthesis, via upregulation of the transcription factor pancreatic duodenal homeobox-1 (PDX-1). Within the pancreas, GLP-1 expands  $\beta$ -cell mass via promotion of  $\beta$ -cell growth and reduction of  $\beta$ -cell death in rodent models [5;6] and possibly in human as well [7]. Furthermore, GLP-1 also slows the rate of absorption of nutrients into the blood stream by reducing food intake and inhibiting gastric emptying [8]. Whole body GLP-1 receptor-null mice exhibit moderate glucose intolerance and disrupted islet architecture suggesting that GLP-1 receptor signaling in islets is required for normal function and development [9].

While the biological relevance and pathological impact is yet to be fully clarified, clinical studies have demonstrated that GLP-1 secretion is decreased in human subjects with diabetes, which highlights the potential use of GLP-1 as a therapeutic approach for type 2 diabetes. However, despite its numerous anti-diabetic

functions, GLP-1 is rapidly degraded *in vivo*, with a half-life of  $<2$  min, due to degrading enzyme DPP IV and rapid kidney clearance [10]. GLP-1 receptor agonists analogous to native GLP-1 have thus been developed as an alternative approach to increase GLP-1R activity in the treatment of type 2 diabetes. Exendin-4 (Ex-4), a lizard salivary gland peptide, that has high sequence homology to mammalian GLP-1 and is resistant to enzymatic degradation [8] has been approved for the treatment of type-2 diabetes since 2005 [11]. Other formulations using GLP-1 mimetics have been also developed to overcome the pharmacokinetic limitations of GLP-1 for the treatment of type 2 diabetes [11].

We have recently developed a platform for the production of GLP-1 fusion peptides consisting of GLP-1 or GLP-1 related molecules and immunoglobulin constant region or Fc domain (GLP-1-IgG-Fc) [12;13]. Various versions of GLP-1-IgG fusion proteins are designed based on different IgG sub-types or different IgG species for pre-clinic or clinic research. Using gene therapy strategy, we have demonstrated that a single intramuscular injection resulted in a persistent expression of GLP-1/IgG-Fc fusion protein in mice, which, as a results, improved insulin production and normalized glucose tolerance in T2D db/db mice [13] and reduced diabetes incidence in streptozotocin (STZ)-induced beta-cell injury T1D mouse model [12]. In the present study, we show that GLP-1/hIgG2, by fusion of GLP-1 with human IgG2 Fc, retains native GLP-1 activities. We demonstrate that GLP-1/IgG2

interacts with GLP-1R and stimulates insulin-secretion in insulin-secreting INS-1 cells, in a glucose-concentration dependent fashion. Upon binding, GLP-1/hIgG<sub>2</sub> is rapidly endocytosed by INS-1 cells, in a dynamin-dependent manner. Pharmacokinetic studies in CD1 mice show that after a single intraperitoneal injection (i.p.), the fusion protein rapidly appears in circulation and remained at a high level for more than a week. The fusion protein has anti-diabetic effects, which is exemplified by its capacity in reducing the incidence of diabetes in multiple-low-dose streptozotocin-induced type 1 diabetes mouse model. Our results suggest that GLP-1/hIgG<sub>2</sub> may serve as an alternative potent GLP-1 receptor agonist for the treatment of diabetes.

## Materials and Methods

### Animals

7-week-old CD1 mice (Charles River Laboratories, St Constant, QC, Canada) were housed under controlled temperature conditions and a 12-h light/12-h dark cycle in the St Michael's Hospital Animal facility with free access to normal rodent chow and water except where noted. All procedures were conducted according to protocols and guidelines approved by the Canadian Council of Animal Care and the St Michael's Hospital Animal Care committee. Before intervention, body weight, feeding blood glucose, intraper-

itoneal glucose tolerance testing (IPGTT), water consumption, food intake and urine volume were measured and a fasting blood sample was taken from the saphenous vein for serum insulin and glucagon measurement. For diabetes induction, 50 mg/kg body weight of STZ (Sigma Chemical Co., St Louis, MO, USA) was dissolved in 0.01 M cold citrate buffer (pH 4.5) immediately before intraperitoneal injection (for 4 consecutive days). The development of diabetes was monitored by measuring blood glucose from the tail vein using Ascensia ELITE XL glucometer and Ascensia Elite blood glucose test strips.

### Cell culture

Rat insulinoma INS-1 cells (passage 50–65) were maintained in RPMI 1640 medium (Invitrogen, Burlington, ON, Canada) containing fetal bovine serum (10% v/v), 100 Units/ml penicillin G sodium, 100 µg/ml streptomycin sulphate, 55 mg/500 ml sodium pyruvate, 1.14 g/500 ml HEPES, and 1.7 µl/500 ml β-mercaptoethanol at 37°C in an atmosphere of humidified air (95%) and CO<sub>2</sub> (5%). In studies involving serum-starvation, serum was replaced by 0.1% BSA in RPMI 1640 without glucose.

### Expression and purification of GLP-1/hIgG<sub>2</sub>

A schematic (Figure 1A) shows that the cDNA encoding the fusion protein hGHRH/hGLP-1 was chemically synthesized, ligated

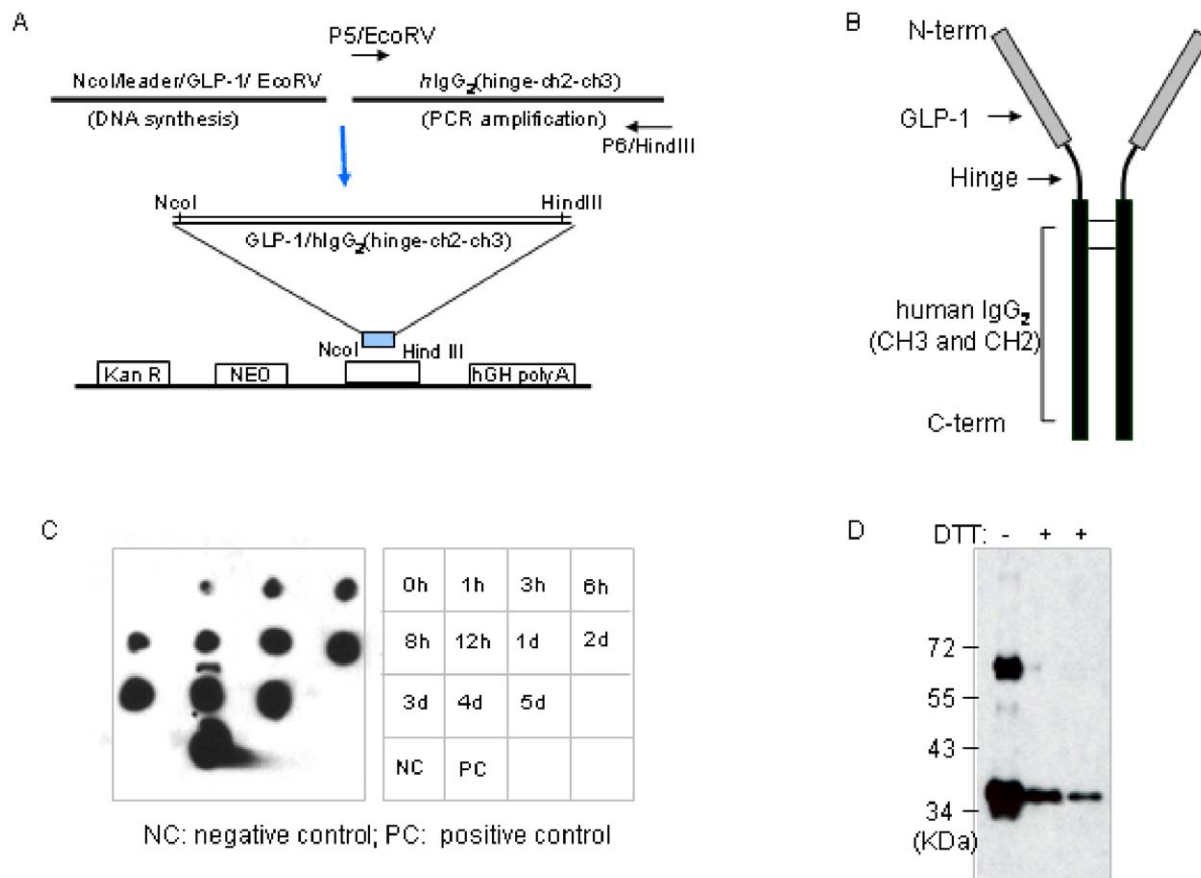

**Figure 1. Construction of GLP-1/hIgG<sub>2</sub> fusion protein.** (A) Illustration shows that the cDNA encoding the fusion protein hGLP-1 chemically synthesized was ligated to a PCR-amplified cDNA fragment coding human IgG<sub>2</sub> FC (hinge-ch2-ch3) and inserted into the NcoI and Hind III sites of a modified mammalian expression vector. (B) The secretable GLP-1/hIgG<sub>2</sub>-Fc fusion proteins are homodimeric. (C) Protein production efficiency was evaluated by the Dot blot with anti-human IgG antibodies using conditional medium from the CHO cells stably expressing the fusion expression. (D) Western blot shows that the GLP-1 fusion protein form stable dimer of molecular weight ~70 kDa and monomer formation under reducing conditions.

doi:10.1371/journal.pone.0012734.g001

to a PCR-amplified cDNA fragment encoding human IgG2 FC (hinge-ch2-ch3) and inserted into the NcoI and Hind III sites of the pAV0243 vector to generate GLP-1/hIgG-Fc/pAV0243. GLP-1/hIgG2 encoding DNA fragment was then amplified using pfu DNA polymerase (Fermentas, Glen Burnie, MD, USA). The GLP-1/hIgG2 gene was then double digested by restriction enzyme BamHI (New England Biolabs, Ipswich, MA, USA) and sub-cloned into a mammalian expression vector pMPGCR5 (a gift from Dr. R Gilbert, NRC Biotechnology Research Institute, Canada). For stable expression, CHO cells (a gift from Dr. R Gilbert) were expanded in CD-CHO complete medium (Invitrogen Life Science, Faraday Avenue Carlsbad, CA, USA) containing with  $1 \times 10^6$  HT, 4 mM L-glutamine, then transfected with GLP-1/hIgG2-pMPGCR5 constructs. Stable expressing clones were selected by 600 mg/ml Hygromycin B (BioShop Canada Inc., Burlington, ON, Canada) screen and finally amplified into 500 ml CD-CHO complete medium in suspension culture at 225 rpm at 37°C until the cells density reached at  $7 \times 10^6$  cells/ml. The cultured CD-CHO medium was harvested, filtered and the GLP-1/hIgG2 fusion protein was purified by using Protein A Ceramic HyperD<sup>®</sup> F sorbent (Pall Corporation, Port Washington, NY, USA) and Immunopure Gentle Ag/Ab binding and elution buffers (Thermo Fisher Scientific, Rockford, IL, USA). Selected fractions were pooled, dialyzed into  $1 \times$  PBS, pH 7.4 and stored at  $-80^\circ\text{C}$ .

### Immunoblot

Purified GLP-1/hIgG2 fusion protein was resolved by 10% SDS-PAGE and transferred to a PVDF membrane. The membrane was probed with goat-anti-human IgG antibodies (1:3000, Southern Biotech, Birmingham, AL, USA) or anti-GLP-1 antibodies overnight at 4°C and detected using HRP-conjugated secondary antibodies (1:5000, Jackson Lab, Bar Harbor, ME, USA) and visualized by enhanced chemiluminescence (GE Healthcare Bio-Sciences Corp., Piscataway, NJ, USA).

### Insulin secretion assay

INS-1 cells were plated in 24-well plates with a density of  $2.5 \times 10^5$  cells/well in RPMI 1640 medium containing 10% FBS. The following day, the medium was replaced with fresh KRB buffer devoid of glucose for 120 min. The cells were then treated with 2.8 or 16.8 mM glucose and various concentrations of purified GLP-1/hIgG2 fusion proteins in KRB buffer for 2 h. The insulin levels in conditioned KRB buffer were measured using a rat insulin RIA kit (Linco, St Charles, MO, USA) according to the manufacturers' instructions.

### GLP-1 receptor binding assay

The binding affinity of GLP-1/hIgG2 was determined in a setting of cellular ELISA. Briefly, INS-1 cells grown in 96 well plates (BD Biosciences) at roughly 95% confluence were rinsed with PBS and fixed with 4% paraformaldehyde (Thermo Scientific) for 10 min at room temperature and quenched for 5 min with 2% glycine in PBS, pH 7.5. For the binding capacity experiment, cells were incubated with logarithmic dilutions of GLP-1/Fc alone ( $1 \times 10^{-5}$  to  $1 \times 10^{-12}$  M) for total binding or in combination with 10  $\mu\text{M}$  GLP-1 (Abcam Inc, USA) for non-specific binding. For the competitive binding experiment, we used fixed GLP-1/Fc concentration (10  $\mu\text{M}$ ) and competed its binding with varying concentration of GLP-1, Exendin-4 and glucagon (Bachem Americas, Inc. USA) ( $1 \times 10^{-5}$  to  $1 \times 10^{-12}$  M). After a 4-h incubation at 4°C in a final volume of 100  $\mu\text{l}$ , excess GLP-1 receptor agonists were washed and the cells blocked with 5% BSA (BD Biosciences). Bound residual GLP-1/Fc was detected by goat anti-human IgG-Fc antibody (1:4000, Southern Biotech) and

detected by HRP-conjugated donkey anti-goat IgG (1:5000, Jackson ImmunoResearch). Ortho-Phenylenediamine (OPD) substrate (Fisher Scientific) was added for enzymatic reaction and the colorimetric change was analyzed by reading absorbance at 490 nm in a Beckman microplate reader.

### Internalization Studies

Internalization of receptor-bound ligand was determined in INS-1 cells or INS-1 cells transfected with wild type or dominant negative dynamin constructs (kind gift of Dr. YT Wang, University of British Columbia, BC, Canada) using Lipofectamine 2000 according to manufacturer's instructions. In Brief, INS-1 cells were plated on poly-L-Lys coated 18 mm cover slip in 35 mm dishes at a confluence of 70%–80% in RPMI 1640 medium containing 10% FBS. The cells were switched into pre-cooled RPMI 1640 (10% FBS) medium containing 1  $\mu\text{M}$  GLP-1/hIgG2 and incubated at 4°C for 30 minutes, then at 37°C for 0, 15, 60, and 90 minutes. The cells were then fixed with 3% paraformaldehyde for 10 min and blocked with 2% BSA in PBS containing 0.1% Triton X-100 at room temperature for 1 hour. The cells were then incubated with goat-anti-human IgG antibody (1:500, Southern Biotech, Birmingham, AL, USA) and Cy3-conjugated anti-goat antibody (1:500, Jackson Lab, Bar Harbor, ME, USA) consecutively. These cells were then stained with Top3 dye (1:20,000) at room temperature for 10 minutes. The images were captured in a LEICA confocal microscope (DMIRE2).

### Pharmacokinetics of GLP-1/hIgG2 in mice

Male CD1 mice ( $n = 3$ ) were intra-peritoneally injected with GLP-1/hIgG2 with a dose of 1  $\mu\text{g}/\text{mice}$ . Serum samples were collected at 0, 0.5, 24, 96, 120, 168 and 192 hours after GLP-1/hIgG2 administration in DPP-IV inhibitors and aprotinin (10  $\mu\text{M}$  and 50 KU/ml, respectively; Sigma Chemical Co., St Louis, MO, USA). The concentration of total GLP-1 was measured by using a total GLP-1 RIA kit (LINCO, St Charles, MO, USA) according to the manufacturer's instructions.

### GLP-1/hIgG2 stability assay

Serum samples were collected from mice, pooled and mixed, and kept on ice. Recombinant GLP-1 (Abcam, Inc) or GLP-1/hIgG2 fusion proteins were incubated with 50  $\mu\text{l}$  serum samples at final concentration of 75 pmol. The mixtures were then incubated at 37°C for indicated time period allowing DPP-IV enzymatic reaction. The reactions were terminated by adding DPP-IV inhibitors and aprotinin (50  $\mu\text{M}$  and 250 KU/ml, respectively) and un-degraded peptides were then determined by active GLP-1 ELISA kit (Linco, St Charles, MO, USA).

### Intraperitoneal glucose tolerance test (IPGTT), insulin tolerance test (ITT)

Male CD1 mice ( $n = 10$ ) were fasted overnight for 15 h and were dosed intraperitoneally with GLP-1/hIgG2 (1  $\mu\text{g}/\text{mice}$ ) or saline as the control 30 minutes prior to the IPGTT. For IPGT, mice were given 1.5 g glucose/kg body weight (anhydrous dextrose; EMD Chemicals Inc., Gibbstown, NJ, USA) via intraperitoneal injection. Blood was drawn from the tail vein and glucose levels were measured using a glucometer at 0, 10, 20, 30, 60 minutes after glucose administration. For ITT, mice were i.p. injected with insulin (2.0 U g/kg), blood glucose levels were measured at the indicated times.

### Statistical analysis

The data were analyzed and the binding curves were fitted by a one-site receptor model using Graphpad Prism 5.0 program.

Briefly,  $B_{max}$  and  $K_d$  of GLP-1/Fc were calculated by following the Specific-Nonspecific binding algorithm for one site binding, using the formula: Specific binding =  $B_{max} * [L]/(K_d + [L])$ , where  $B_{max}$  is the maximal binding at a given  $[L]$ ,  $[L]$  = Ligand concentration. The  $IC_{50}$  for glucagon, GLP-1 and Exendin-4 were determined by the competitive binding for one site algorithm. All data were presented as mean  $\pm$  SEM. Statistical analysis was performed using Student's *t* test. A *p*-value of less than 0.05 was considered to be statistically significant.

## Results

### GLP-1/hIgG2 fusion protein production

The expression constructs were engineered in an optimal balance of efficacy and safety. An illustration (Figure 1A) shows that the cDNA encoding the fusion protein hGLP-chemically synthesized was ligated to a PCR-amplified cDNA fragment coding human IgG2 FC (hinge-ch2-ch3) and inserted into the NcoI and Hind III sites of a mammalian expression vector to generate GLP-1/hIgG. The secretable GLP-1/hIgG-Fc fusion protein consisting of the active GLP-1 molecule [7–37] directly linked to the IgG-Fc encompassing the human IgG2 constant heavy-chain is shown in (Figure 1B). The linker between the two molecules is achieved by a design of the construct containing nucleic acids sequence code for the natural hinge region of the human IgG2, which provides flexibility facilitating the ligand-receptor binding [14]. Since the fusion junction does not contain an artificial linker and thus has minimized immunogenicity. The CHO cells stably transfect with the fusion expression vectors, in a suspension culture with serum-free chemical defined medium, have efficient production efficiency (Figure 1C). The fusion proteins are secreted as homodimers upon expression as determined by Western blot using anti-human IgG (Figure 1D) or anti-GLP-1 antibodies (not shown).

### In vitro characterization of GLP-1/hIgG2

Using cellular ELISA based receptor binding assay we determined binding capacity of GLP-1/hIgG2 in INS-1 cells. The results showed that the binding of GLP-1/hIgG2 to INS-1 cells was fusion protein-concentration dependent, at a maximum binding of 1  $\mu$ M GLP-1/Fc and with a  $K_d$  of  $13.90 \pm 1.52$  nM (Figure 2A). Results of competitive binding assays, where GLP-1/IgG2 concentration was fixed at 10  $\mu$ M with varying concentration of Ex-4, GLP-1 and glucagon, showed 50% inhibition of the binding of GLP-1/hIgG2 to INS-1 cells ( $IC_{50}$ ) at  $13.75 \pm 0.07$  nM

for native GLP-1 and  $8.15 \pm 0.085$  nM for exendin-4, respectively (Figure 2B). Glucagon could not compete with the fusion protein at the concentration range used. Internalization studies showed that GLP-1 receptors were rapidly internalized 10 min after stimulation, as demonstrated by an increase in the cytoplasmic GLP-1/hIgG2 staining (Figure 3A). However, the internalization was reduced in the INS-1 cells over-expressing dominant-negative dynamin by transfection, but not in the cells transfected with wild type dynamin (Figure 3B), suggesting that the internalization process of GLP-1/hIgG2-GLP-1R is partially dynamin-dependent [15].

Insulin secretion RIA showed that GLP-1/hIgG2 stimulated insulin secretion from INS-1 cells in a dose and glucose concentration dependent fashion (Figure 4A). To investigate whether GLP-1/hIgG2 fusion protein are more resistant to serum DPPIV, we conducted the stability assay using active GLP-1 ELISA kit. As shown (Figure 4B), both native GLP-1 and GLP-1/hIgG2 were degraded by serum DPPIV, however, the GLP-1 fusion protein displayed much slower decay rate, compared to the native GLP-1. These *in vitro* studies suggested that GLP-1/hIgG2 has biological relevance in insulin-secreting cells via activation of GLP-1 receptor, and that GLP-1 in the IgG fusion format is relatively resistant to the degrading enzyme(s).

### In vivo studies in mice

Pharmacokinetic data showed that 30–60 min after a single-dose administration in CD1 mice, circulating GLP-1/hIgG2 concentration was significantly increased as determined by GLP-1 RIA. The circulating fusion protein was found to plateau at 24-h and thereafter it gradually decreased but could still be detected 192-h after the single dose-injections (Figure 5).

To determine if the GLP-1/hIgG2 fusion protein has glucoregulatory effects *in vivo*, IPGTT was performed 30 min after the drug injection. As shown, GLP-1/hIgG2 reduced glucose excursion (Figure 6A). In order to examine if GLP-1/hIgG2 fusion protein has long-lasting effects on improving glucose tolerance, IPGTT was performed 192-h after a single-dose administration of GLP-1/hIgG2 in CD1 mice. As shown, while the fasting blood glucose levels were not different between GLP-1/hIgG2-injected mice and control mice, the drug-injected mice showed reduced glucose excursion (Figure 6B), suggesting that the fusion protein exerted long-lasting glucoregulatory effects in these mice.

We next assessed whether GLP-1/hIgG2 has anti-diabetic effects using multiple-low-dose streptozotocin-induced type 1 diabetes (MDS) mice. The intraperitoneal injections of GLP-1/hIgG2 (1  $\mu$ g/mouse) were made every third day during the feeding

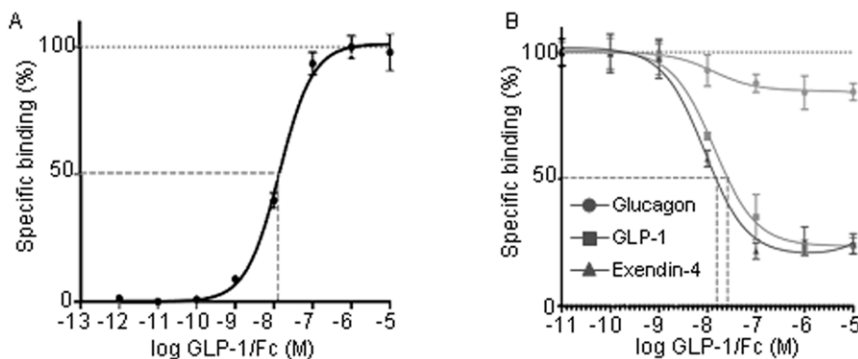

**Figure 2. Assessment of the binding affinity of GLP-1/hIgG2.** (A) Cellular ELISA based ligand-receptor binding assay shows the maximum binding of GLP-1/hIgG2 to INS-1 cells is  $\sim 1$   $\mu$ M with  $K_d$  of  $13.90 \pm 1.52$  nM. (B). Competitive binding assay was performed in a reaction mixture containing 10  $\mu$ M GLP-1 and its competitors Ex-4, GLP-1 and glucagon of varying concentration ( $1 \times 10^{-5}$  to  $1 \times 10^{-12}$  M). doi:10.1371/journal.pone.0012734.g002

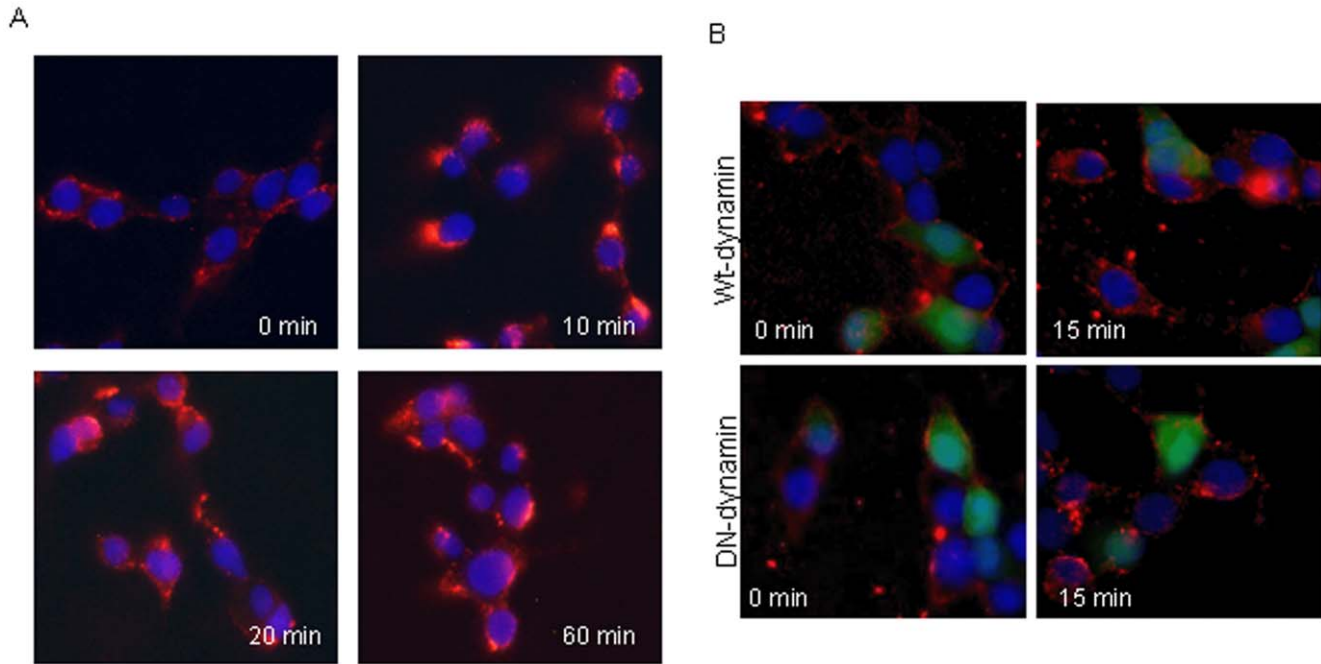

**Figure 3. Endocytosis of GLP-1/hlgG2 is via a dynamin dependent manner.** (A) Internalization of GLP-1/hlgG2-Fc in INS-1 cells (A) Cells were incubated with 1  $\mu$ M GLP-1/hlgG2 at 4°C for 30 minutes, then switched to 37°C for 0, 10, 20 and 60 minutes. After fixation and blocking for non-specific binding, cells were then incubated with goat-anti-human IgG antibody (1:500) followed by secondary Cy3-conjugated anti-goat antibody (1:500) and Top3 dye (1:20,000) for nuclei staining. The images were then visualized by a confocal microscope. (B) The internalization experiments were performed in cells co-transfected with either wild type dynamin or dominant negative dynamin and green fluorescent protein (GFP). 24 hours after transfection, internalization of GLP-1/hlgG2-Fc was conducted as described in (A). DAPI (1:10,000) was used for nuclei staining and images were taken by a Nikon fluorescent microscope.  
doi:10.1371/journal.pone.0012734.g003

course and the first drug injection was made 3 days prior to the streptozotocin treatment. As shown, four consecutive intraperitoneal injections of low dose of STZ (50 mg/kg) induced overt diabetic hyperglycemia in all mice 5–7 days after the injections (Figure 7A;  $n = 5$ ). In a contrast, the GLP-1/hlgG2-treated MDSM mice maintained relatively constant glucose levels, although higher than those measured at their earlier ages (Figure 7A), but had no signs of diabetes. When the glucose levels were expressed as the area under the curve (AUC), the changes between the two group mice were statistically significant (Figure 7B,  $p < 0.01$ ). Insulin tolerance

test (ITT) showed that treatment of GLP-1/hlgG2 did not alter the insulin sensitivities (Figure 7C). IPGTT showed that GLP-1/hlgG2-treated MDSM mice had improved glucose tolerance (Figure 7D).

## Discussion

GLP-1 has important functions on regulation of glucose homeostasis and thus has been proposed for the treatment of diabetes. Despite its attractive anti-diabetic actions, the therapeutic potential of using native GLP-1 is limited by its short lifetime

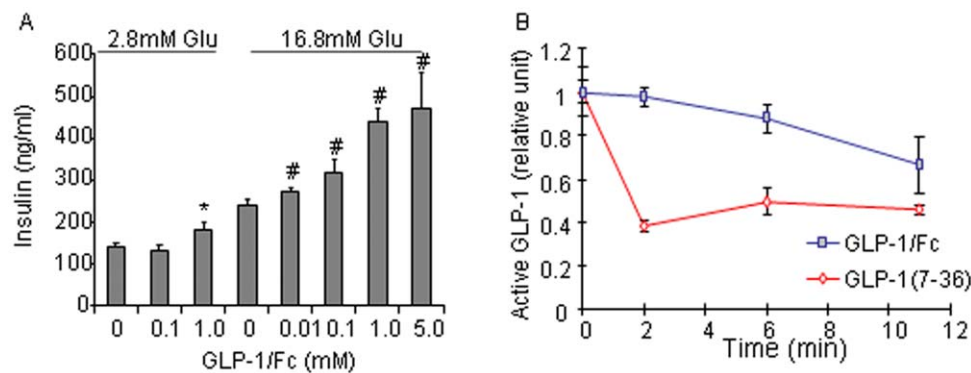

**Figure 4. Stimulation of insulin secretion by GLP-1/hlgG2 in INS-1 cells.** (A) Cells grown in 24-well plates were incubated with fresh KRB buffer devoid of glucose for 2  $\times$  60 min. The cells were then treated with 2.8 or 16.8 mM glucose and various concentrations of purified GLP-1/hlgG2 fusion proteins in KRB buffer for 2 h. The insulin levels in the conditioned KRB buffer were measured using a rat insulin RIA kit. (B) Active GLP-1 was measured by active GLP-1 ELISA kit in the mouse serum samples incubated with recombinant GLP-1 (75 pM) or GLP-1/hlgG2 fusion proteins (75 pM) at 37°C for indicated time period. The reactions were terminated by adding excessive DPP-IV inhibitors and aprotinin.  
doi:10.1371/journal.pone.0012734.g004

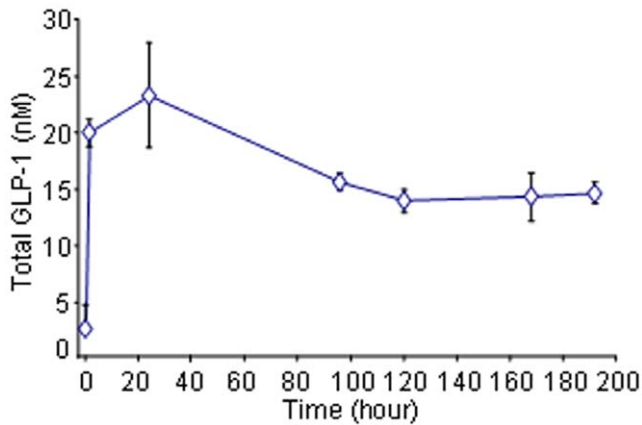

**Figure 5. Pharmacokinetic study of GLP-1/hlgG2 fusion protein in CD1 mice.** CD1 mice were i.p. injected by a single-dose of GLP-1/hlgG2 (1  $\mu$ g/mouse). Blood samples were taken from tail vein at different time points and serum GLP-1 levels were measured by GLP-1 RIA kit.  
doi:10.1371/journal.pone.0012734.g005

(<2 min), mainly due to rapid enzymatic inactivation by DPP-IV [10;16] and renal clearance [17]. These limitations have continued to fuel attempts to develop more potent long-acting GLP-1 analogs. We report here that, a GLP-1 fusion protein, GLP-1/hlgG2, consisting of GLP-1 fused with human IgG Fc, retains native GLP-1 properties and demonstrates long-acting characteristics. This recombinant GLP-1 fusion protein has anti-diabetic and other beneficial features of GLP-1.

The IgG fusion molecules potentially are large molecular weight homodimers and are not expected to be rapidly cleared by the kidneys, and thus have a substantially longer half-life and better metabolic profiles [18;19]. Fc fusion based drugs provide a numbers of advantages and have become credible alternatives to monoclonal antibodies as therapeutics [20;21]. GLP-1/hlgG2 fusion molecules are produced as homodimers, comprising of two IgG CH2/CH3 chains fused to a pair of GLP-1 molecules with molecular mass of 70 kilo Daltons (Figure 1D) and had a substantially longer half-life. Our pharmacokinetic data showed that that the fusion proteins are detectable a week after a single dose injection in mice. IPGTT showed that the glucoregulatory effects of GLP-1/hlgG2 were maintained 8 days after a single

dose-injection, suggesting that the detected fusion protein were still biologically active. Although the fusion protein contains a native GLP-1, the GLP-1 in the fusion design is expected to have reduced susceptibility to degradation since such degrading enzymes have a preference for smaller peptides [22]. Indeed, our *in vitro* stability assay results supported this notion, which is also supported by our previous evidence that *in vivo* expression of GLP-1/mIgG-Fc or exendin-4/mIgG-Fc fusion proteins achieved equivalent efficacy in mice [12].

Ligand-receptor binding parameters suggest that GLP-1/hlgG2 has high binding affinity to the GLP-1R in INS-1 cells which is comparable to those of extending-4 (Figure 2) as well as those of native GLP-1 [23]. The retained high binding affinity is also suggestive of the fact that the fusion process most likely did not alter the proximal conformation of native GLP-1. It is likely that GLP-1/hlgG2 that contains the genetically engineered linker, equivalent to the natural hinge region of human IgG2, may provide flexibility and sufficient spatial structure for appropriate binding of GLP-1 to its receptor [14]. It is of note that the design of the linker sequence of the genetic fusion is considered to be critical for maintenance of peptide activity [21]. A recent study by Picha KM [24] et al. reported that CNTO736, a GLP-1 peptide analog, genetically fused to a Fc portion of IgG has an optimized linker sequence which provided higher activity when compared to other reported fusions of GLP-1 to an IgG1 Fc or albumin [24;25]. Our results indicate that, a hinge region of human IgG2 that functions as a linker, provide an optimized binding of fused GLP-1 molecule to its receptor. Furthermore, the dimeric GLP-1, conjugated with an Fc fragment, is expected to increase the ligand avidity since homodimeric GLP-1 can potentially recruit additional GLP-1Rs and amplify intracellular signaling via preformed GPCR dimers/oligomers [26]. The ability of the fusion protein to stimulate insulin secretion in INS-1 cells in a glucose-dependent manner further suggests that the GLP-1 fusion protein retains the biological activities of the native GLP-1.

Using human IgG2 in the fusion protein appears to be advantageous over the use of other subclasses of IgG. Of all human IgG isotypes, IgG2 has the lowest affinity for Fc $\gamma$ RI [27;28]. Fc $\gamma$ RI is a high affinity Fc receptor that binds IgG1, IgG3, or IgG4 in monomeric form, and can induce antibody dependent cellular toxicity (ADCC) [29;30]. IgG2-coated red blood cells (RBCs) did not activate phagocytes and were not lysed by these cells, unlike RBCs coated with other IgG isotypes [29]. In contrast to Fc $\gamma$ RI, other activating Fc receptors are of low affinity

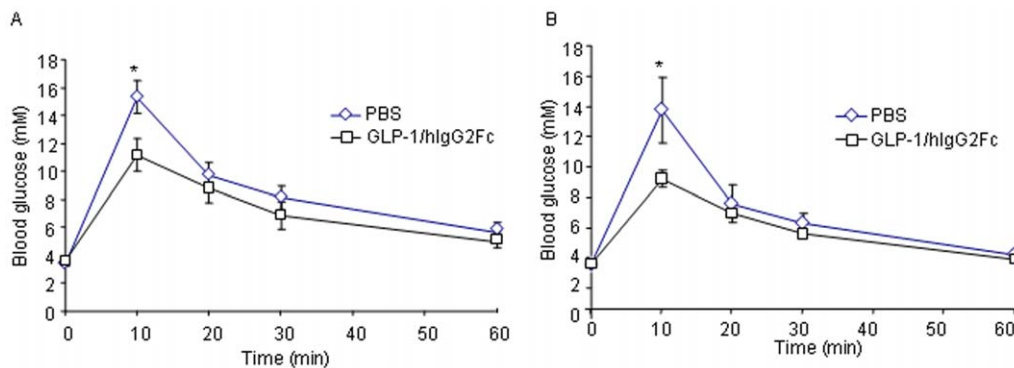

**Figure 6. Intraperitoneal Glucose Tolerance Test (IPGTT) shows that GLP-1/hlgG2 improves glucose tolerance in CD-1 mice.** After 16 h fasting, CD1 mice were i.p. injected with GLP-1/hlgG2 (1  $\mu$ g/mouse). 30 min after the injection, IPGTT were conducted by i.p. injection of 1.5 g/kg of glucose and blood glucose levels were measured by a glucometer at 0, 10, 20, 30, 60 minutes after glucose administration. (B) 192-h after a single-dose injection of GLP-1/hlgG2 in CD1 mice, the mice were fasted for 16 h and IPGTT were conducted as described in (A).  
doi:10.1371/journal.pone.0012734.g006

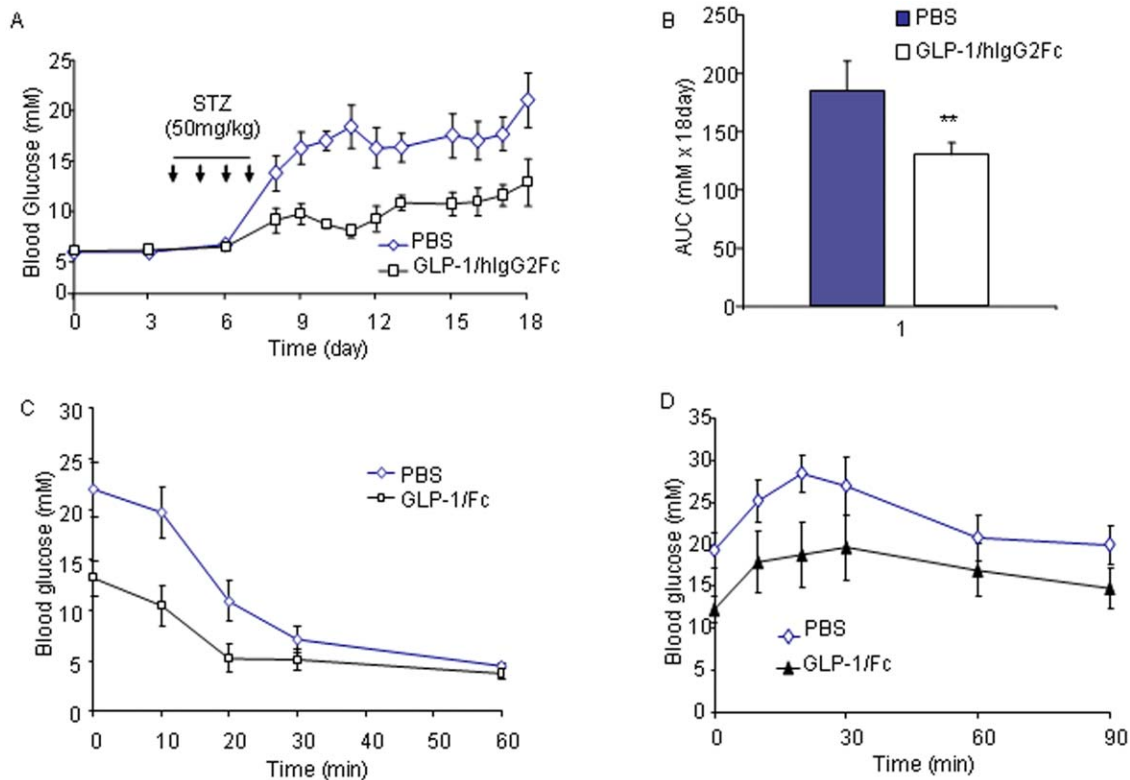

**Figure 7. GLP-1/hlgG2 improves glucose regulation in MDSG mice.** (A) The intraperitoneal injections of GLP-1/hlgG2 (1  $\mu$ g/mouse) were made every three days during the course of experiment and the first drug injection was made 3 days prior to the multiple low dose streptozotocin treatment (50 mg/kg/day for 4 consecutive i.p. injections). Glucose levels were measured by a glucometer at indicated times. (B) The glucose levels were expressed as the area under the curve (AUC). (C) Insulin tolerance test (ITT) was conducted by injecting insulin (2.0 U/kg, i.p.) and blood glucose levels were measured at indicated times. (D) IPGTT was performed in MDSG mice treated with PBS or GLP-1/hlgG2-Fc at the end of the experiment as shown in (A).

doi:10.1371/journal.pone.0012734.g007

and only bind multimeric IgG as found in immune complexes and, in any case, IgG2 also has low affinity for these receptors [30]. Thus, native IgG2 or GLP-1/hlgG2 constructs are not likely to bind to activating Fc receptors *in vivo*. Moreover, IgG2-Fc binds to the inhibitory Fc $\gamma$ RIIB receptor on some immune cells [30], which further reduces the probability of Fc induced immunity. The use of hlgG2Fc would be a better control, but our previous work showed that Fc fragments have no effect on glucose homeostasis [12,13]. The tissue distribution of hlgG2Fc might be different since it will not bind to GLP-1 receptor positive cells. The only receptors hlgG2Fc is likely to bind are the Fc receptors of immune cells. The relatively low levels of hlgG2Fc in control mice would have to compete with mouse IgG, which is present in large amounts in the serum (approximately 10 mg/ml), so that the effect would be minimal or nil. Therefore, we believe that the use of vehicle is an appropriate control in our experiments.

The delivery of protein drugs has often led to the rise in production of neutralizing antibodies which may diminish or abolish the activity of a peptide hormone in the recipient. Neutralizing antibodies are generated mostly when the injected protein is foreign object containing antigenic determinants or when the protein is co-administered with a vehicle or by a route that promotes immunity [31;32]. This is initiated when B-lymphocytes bind to the hormone through the B-cell antigen receptor. However, B-cell stimulation can be prevented by co-ligating inhibitory Fc $\gamma$ RIIB receptors [33;34]. We postulated that B-cell reactivity to GLP-1 will be prevented or diminished when

this peptide is fused to an Fc segment, through the co-engagement of the Fc $\gamma$ RIIB [13;30]. This is supported by our recent observations in mice, where we found that exendin-4 neutralizing antibodies were detected in mice exposed to Ex-4 but not to Ex4-IgG-Fc (Liang YM et al unpublished data), consistent with the tolerance effect of IgG carrier proteins [35;36].

Binding of GLP-1 activates the adenylyl cyclase pathway, which ultimately results in a increase of glucose-induced insulin secretion [23;37]. Our previous data [13] and others [24] indicated GLP-1-Fc fusions have operated this pathway to exert GLP-1 action in insulin-secreting beta-cells. In present study, we found that GLP-1/hlgG2 was rapidly and extensively internalized after binding to GLP-1R in INS-1 cells, representing the characteristics of native GLP-1 upon binding to its counterpart [38]. In addition, the internalization of GLP-1/hlgG2 in INS-1 cells was found to be dynamin-dependent activity, since the endocytosis of the GLP-1/hlgG2-GLP-1R complexes was significantly blocked in the beta-cells expressing dominant negative dynamin. These results further suggest that, like native GLP-1 [15], GLP-1/hlgG2 initiated GLP-1R trafficking is mediated by a mechanism involving dynamin-caveolin-1 activities in INS- cells[15].

There is potential concern that with long-lived GLP-1R agonists continual exposure of the peptide may result in receptor tachyphylaxis. However, GLP-1-Fc fusion protein did not appear to cause this, at least in mice [24]. Previous *in vivo* studies in rats also showed that a 48-h infusion of GLP-1 resulted in increased insulin secretion and beta-cell proliferation, with no evidence of

loss of activity [39]. In addition, mice with transgenic exendin-4 expression displayed significantly increased insulin levels after oral glucose administration [40], suggesting that incretin responses were not suppressed by the continuous presence of exendin-4. Furthermore, clinical studies have demonstrated that while continuous infusion of native GLP-1 in type 2 diabetic patients reduced blood glucose uniformly after 1 or 6 weeks of treatment [41], a comparison of 16-h and 24-h continuous infusion showed that a better glycemic control could be obtained with sustained 24-h treatment [42]. Finally, IPGTT results showed that 8 days after a single dose-injection of GLP-1/hIgG2 displayed comparable GLP-1 glucoregulatory effects as seen in an acute IPGTT study in CD1 mice. Taken together, these findings highlight the fact that prolonged stimulation of the GLP-1R induces appropriate biological responses. It is possible that the internalization machinery of GLP-1R in the beta-cells may provide a continuous presence of accessible GLP-1R under *in vivo* conditions. Internalization of receptor-ligand complexes is an essential feature of the function of GPCRs and is considered to be required for the dissociation of the ligand from its receptor and for re-sensitization of the receptor [43;44]. This process is possibly executed by dephosphorylation of the receptor by phosphatases encountered in the transit through the endosomal compartment [45;46].

In summary, we have developed a platform for genetic engineering GLP-1 mimetics, in particular, GLP-1 fused with

IgG-Fc segment to achieve long-acting functionality and high efficacy. Various GLP-1 chimera through fusion with either mouse IgG-Fc or human IgG-Fc constructs are designed in order to provide a means for pre-clinical and clinical research. The data presented suggest that the GLP-1 mimetics, exemplified by GLP-1/hIgG2, in which native GLP-1 fused with human IgG2-Fc has improved pharmacokinetic and pharmacodynamic profile. It retains natural GLP-1 binding properties and upon binding, it initiates GLP-1-GLP1R complex membrane trafficking to exert GLP-1 actions, including stimulation of insulin secretion from the beta-cells, and bring into play the glucoregulatory and anti-diabetic effects *in vivo*. Our data suggest that GLP-1/hIgG2 may find application as a long-lasting GLP-1 analogue.

## Acknowledgments

The authors wish to thank Dr. Renald Gilbert for providing protocols for establishment of stable cell line; Dr. Gary Levy and Andre Siegel for providing support in recombinant protein purification.

## Author Contributions

Conceived and designed the experiments: QW RL. Performed the experiments: QW KC RL FZ SG NZ. Analyzed the data: QW KC RL FZ SG NZ. Contributed reagents/materials/analysis tools: GJP. Wrote the paper: QW GJP.

## References

- Meier JJ, Nauck MA (2005) Glucagon-like peptide 1(GLP-1) in biology and pathology. *Diabetes Metab Res Rev* 21: 91–117.
- Holst JJ, Gromada J (2004) Role of incretin hormones in the regulation of insulin secretion in diabetic and nondiabetic humans. *Am J Physiol Endocrinol Metab* 287: E199–E206.
- Todd JF, Wilding JP, Edwards CM, Khan FA, Ghatei MA, et al. (1997) Glucagon-like peptide-1 (GLP-1): a trial of treatment in non-insulin-dependent diabetes mellitus. *Eur J Clin Invest* 27: 533–536.
- Wang Q, Brubaker PL (2002) Glucagon-like peptide-1 treatment delays the onset of diabetes in 8 week-old db/db mice. *Diabetologia* 45: 1263–1273.
- Perfetti R, Zhou J, Doyle ME, Egan JM (2000) Glucagon-like peptide-1 induces cell proliferation and pancreatic-duodenum homeobox-1 expression and increases endocrine cell mass in the pancreas of old, glucose-intolerant rats. *Endocrinology* 141: 4600–4605.
- Li Y, Hansotia T, Yusta B, Ris F, Halban PA, et al. (2003) Glucagon-like peptide-1 receptor signaling modulates beta cell apoptosis. *J Biol Chem* 278: 471–478.
- Patti ME, McMahon G, Mun EC, et al. (2005) Severe hypoglycaemia post-gastric bypass requiring partial pancreatectomy: evidence for inappropriate insulin secretion and pancreatic islet hyperplasia. *Diabetologia* 48: 2236–2240.
- Drucker DJ (2006) The biology of incretin hormones. *Cell Metab* 3: 153–165.
- Scrocchi LA, Brown TJ, McClusky N, Brubaker PL, Auerbach AB, et al. (1996) Glucose intolerance but normal satiety in mice with a null mutation in the glucagon-like peptide 1 receptor gene. *Nat Med* 2: 1254–1258.
- Kieffer TJ, McIntosh CH, Pederson RA (1995) Degradation of glucose-dependent insulinotropic polypeptide and truncated glucagon-like peptide 1 in vitro and in vivo by dipeptidyl peptidase IV. *Endocrinology* 136: 3585–3596.
- Lovshin JA, Drucker DJ (2009) Incretin-based therapies for type 2 diabetes mellitus. *Nat Rev Endocrinol* 5: 262–269.
- Soltani N, Kumar M, Glinka Y, Prud'homme GJ, Wang Q (2007) In vivo expression of GLP-1/IgG-Fc fusion protein enhances beta-cell mass and protects against streptozotocin-induced diabetes. *Gene Ther* 14: 981–988.
- Kumar M, Hunag Y, Glinka Y, Prud'homme GJ, Wang Q (2007) Gene therapy of diabetes using a novel GLP-1/IgG1-Fc fusion construct normalizes glucose levels in db/db mice. *Gene Ther* 14: 162–172.
- Woof JM, Burton DR (2004) Human antibody-Fc receptor interactions illuminated by crystal structures. *Nat Rev Immunol* 4: 89–99.
- Syme CA, Zhang L, Bisello A (2006) Caveolin-1 regulates cellular trafficking and function of the glucagon-like Peptide 1 receptor. *Mol Endocrinol* 20: 3400–3411.
- Mentlein R, Gallwitz B, Schmidt WE (1993) Dipeptidyl-peptidase IV hydrolyses gastric inhibitory polypeptide, glucagon-like peptide-1(7-36)amide, peptide histidine methionine and is responsible for their degradation in human serum. *Eur J Biochem* 214: 829–835.
- Ruiz-Grande C, Pintado J, Alarcon C, Castilla C, Valverde I, et al. (1990) Renal catabolism of human glucagon-like peptides 1 and 2. *Can J Physiol Pharmacol* 68: 1568–1573.
- Weir AN, Nesbitt A, Chapman AP, Popplewell AG, Antoniw P, et al. (2002) Formatting antibody fragments to mediate specific therapeutic functions. *Biochem Soc Trans* 30: 512–516.
- Larrick JW, Fry KE (1991) Recombinant antibodies. *Hum Antibodies Hybridomas* 2: 172–189.
- Dumont JA, Low SC, Peters RT, Bitonti AJ (2006) Monomeric Fc fusions: impact on pharmacokinetic and biological activity of protein therapeutics. *BioDrugs* 20: 151–160.
- Huang C (2009) Receptor-Fc fusion therapeutics, traps, and MIMETIBODY technology. *Curr Opin Biotechnol* 20: 692–699.
- Hupe-Sodmann K, McGregor GP, Bridenbaugh R, et al. (1995) Characterisation of the processing by human neutral endopeptidase 24.11 of GLP-1(7-36) amide and comparison of the substrate specificity of the enzyme for other glucagon-like peptides. *Regul Pept* 58: 149–156.
- Irwin DM, Satkunarajah M, Wen Y, Brubaker PL, Pederson RA, et al. (1997) The Xenopus proglucagon gene encodes novel GLP-1-like peptides with insulinotropic properties. *Proc Natl Acad Sci U S A* 94: 7915–7920.
- Picha KM, Cunningham MR, Drucker DJ, Mathur A, Ort T, et al. (2008) Protein engineering strategies for sustained glucagon-like peptide-1 receptor-dependent control of glucose homeostasis. *Diabetes* 57: 1926–1934.
- Baggio LL, Huang Q, Brown TJ, Drucker DJ (2004) A recombinant human glucagon-like peptide (GLP)-1-albumin protein (albugon) mimics peptidergic activation of GLP-1 receptor-dependent pathways coupled with satiety, gastrointestinal motility, and glucose homeostasis. *Diabetes* 53: 2492–2500.
- George SR, O'Dowd BF, Lee SP (2002) G-protein-coupled receptor oligomerization and its potential for drug discovery. *Nat Rev Drug Discov* 1: 808–820.
- Jefferis R, Lund J (2002) Interaction sites on human IgG-Fc for FcγR3: current models. *Immunol Lett* 82: 57–65.
- Murphy K, Travers P, Walport M, eds. *Janeway's Immunobiology* 7<sup>th</sup> Edition, Garland Science, NY. 409–413. 2008. (GENERIC).
- Kumpel BM, Beliard R, Brossard Y, et al. (2002) Section 1C: Assessment of the functional activity and IgG Fc receptor utilisation of 64 IgG Rh monoclonal antibodies. Coordinator's report. *Transfus Clin Biol* 9: 45–53.
- Prislovsky A, Marathe B, Hosni A, Bolen AL, Nimmerjahn F, et al. (2008) Rapid platelet turnover in WASP(-) mice correlates with increased ex vivo phagocytosis of opsonized WASP(-) platelets. *Exp Hematol* 36: 609–623.
- Lee AY, Chey WY, Choi J, Jeon JS (2002) Insulin-induced drug eruptions and reliability of skin tests. *Acta Derm Venereol* 82: 114–117.
- Ahangari G, Ostadali MR, Rabani A, Rashidian J, Sanati MH, et al. (2004) Growth hormone antibodies formation in patients treated with recombinant human growth hormone. *Int J Immunopathol Pharmacol* 17: 33–38.
- Takai T (2005) Fc receptors and their role in immune regulation and autoimmunity. *J Clin Immunol* 25: 1–18.
- King LB, Monroe JG (2000) Immunobiology of the immature B cell: plasticity in the B-cell antigen receptor-induced response fine tunes negative selection. *Immunol Rev* 176: 86–104.: 86–104.



35. Melo ME, Qjan J, El-Amine M, Agarwal RK, Soukhareva N, et al. (2002) Gene transfer of Ig-fusion proteins into B cells prevents and treats autoimmune diseases. *J Immunol* 168: 4788–4795.
36. Uray K, Medgyesi D, Hilbert A, Sarmay G, Gergely J, et al. (2004) Synthesis and receptor binding of IgG1 peptides derived from the IgG Fc region. *J Mol Recognit* 17: 95–105.
37. Thorens B, Waeber G (1993) Glucagon-like peptide-I and the control of insulin secretion in the normal state and in NIDDM. *Diabetes* 42: 1219–1225.
38. Jorgensen R, Martini L, Schwartz TW, Elling CE (2005) Characterization of glucagon-like peptide-1 receptor beta-arrestin 2 interaction: a high-affinity receptor phenotype. *Mol Endocrinol* 19: 812–823.
39. Wang Y, Perfetti R, Greig NH, Holloway HW, DeOre KA, et al. (1997) Glucagon-like peptide-1 can reverse the age-related decline in glucose tolerance in rats. *J Clin Invest* 99: 2883–2889.
40. Baggio LL, Kim JG, Drucker DJ (2004) Chronic exposure to GLP-1R agonists promotes homologous GLP-1 receptor desensitization in vitro but does not attenuate GLP-1R-dependent glucose homeostasis in vivo. *Diabetes* 53 Suppl 3: S205–14. S205-S214.
41. Zander M, Madsbad S, Madsen JL, Holst JJ (2002) Effect of 6-week course of glucagon-like peptide 1 on glycaemic control, insulin sensitivity, and beta-cell function in type 2 diabetes: a parallel-group study. *Lancet* 359: 824–830.
42. Larsen J, Hylleberg B, Ng K, Damsbo P (2001) Glucagon-like peptide-1 infusion must be maintained for 24 h/day to obtain acceptable glycemia in type 2 diabetic patients who are poorly controlled on sulphonylurea treatment. *Diabetes Care* 24: 1416–1421.
43. Yu SS, Lefkowitz RJ, Hausdorff WP (1993) Beta-adrenergic receptor sequestration. A potential mechanism of receptor resensitization. *J Biol Chem* 268: 337–341.
44. Pippig S, Andexinger S, Lohse MJ (1995) Sequestration and recycling of beta 2-adrenergic receptors permit receptor resensitization. *Mol Pharmacol* 47: 666–676.
45. Widmann C, Dolci W, Thorens B (1997) Internalization and homologous desensitization of the GLP-1 receptor depend on phosphorylation of the receptor carboxyl tail at the same three sites. *Mol Endocrinol* 11: 1094–1102.
46. Barak LS, Tiberi M, Freedman NJ, Kwatra MM, Lefkowitz RJ, et al. (1994) A highly conserved tyrosine residue in G protein-coupled receptors is required for agonist-mediated beta 2-adrenergic receptor sequestration. *J Biol Chem* 269: 2790–2795.
